# Supplementary material for: Comprehensive clinical analysis of AKR1 expression profiles in the diagnosis of human colorectal cancer
Source: Research Square preprint supplement (doi:10.21203/rs.3.rs-2526991/v1), 2023-02-07
Supplement: Supplementary file 1 [file baf3ced2e7ea24b7dd48088d.docx]

**Supplement 1**  qRT-PCR primers of human AKR1s

| AKR1A1-5.1 | AGAGTGAGCCTGGTCAGGTA |
| --- | --- |
| AKR1A1-3.1 | CTTGGGGAAGGGGTTGTCTC |
| AKR1B1-5.1 | GGTGATCCCCAAGTCTGTGA |
| AKR1B1-3.1 | AATCCTTGTGGGAGGTACA |
| AKR1B10-5.1 | CCTGTAACGTGTTGCAATCCTC |
| AKR1B10-3.1 | CAGCACCTCGATTCTCGTCT |
| AKR1B15-5.1 | CACATTGTTGAGAACATTCAGGTCT |
| AKR1B15-3.1 | CTTGAAGTCAAAGGCCCTCC |
| AKR1C1-5.1 | CTAGGCTGAAAAATCCCCCT |
| AKR1C1-3.1 | AGCGTTACACACTTCACTAC |
| AKR1C2-5.1 | GTAAAGCTCTAGAGGCCGTC |
| AKR1C2-3.1 | TTCAGTGACCTTTCCAAGGC |
| AKR1C3-5.1 | AAAGCCAGGTGAGGAACTTTCA |
| AKR1C3-3.1 | TCCACCCATCGTTTGTCTCG |
| AKR1C4-5.1 | AACCAGCCTTGGAAAGCTCA |
| AKR1C4-3.1 | TTGGTAGTGGCGTCTCACCT |
| AKR1D1-5.1 | GCGCGATCATCCTGAATACCCATT |
| AKR1D1-3.1 | GACTGAGTCAAAGTCATTTACACTGCAC |
| AKR1E2-5.1 | GATATCCCAGCCGTGGGC |
| AKR1E2-3.1 | TCTGGATGAGGAGGCTTGAA |
| MC-β-Actin 5.1 | TGGATCAGCAAGCAGGAGTA |
| MC-β-Actin 3.1 | TCGGCCACATTGTGAACTTT |
