# Supplementary material for: Comprehensive clinical analysis of AKR1 expression profiles in the diagnosis of human colorectal cancer
Source: Research Square preprint supplement (doi:10.21203/rs.3.rs-2526991/v1), 2023-02-07
Supplement: Supplementary file 2 [file ce3f10ab1276c613dfb4b290.docx]

**Supplement 4** AKR1 gene expression and mutation analysis in CRC (cBioPortal)

|  | Colorectal Adenocarcinoma | | | | | | Colorectal Cancer | | | | | |
| --- | --- | --- | --- | --- | --- | --- | --- | --- | --- | --- | --- | --- |
| Gene | Case | Altered (%) | Mutation(%) | Amplication(%) | Deep Deletion(%) | Multiple Alteration(%) | Case | Altered (%) | Mutation(%) | Amplication(%) | Deep Deletion(%) | Multiple Alteration(%) |
| ARKs | 1377 | 7.33 | 6.9 | 0.22 | 0.07 | 0.15 | 1564 | 2.43 | 1.79 | 0.26 | 0.32 | 0.06 |
| AKR1A1 | 1377 | 0.29 | 0.22 | 0.07 |  |  | 1564 | 0.38 | 0.06 |  | 0.32 |  |
| AKR1B1 | 1377 | 1.74 | 1.6 | 0.15 |  |  | 1564 | 0.45 | 0.38 | 0.06 |  |  |
| AKR1B10 | 1377 | 1.23 | 1.09 | 0.15 |  |  | 1564 | 0.19 | 0.13 | 0.06 |  |  |
| AKR1B15 | 1377 | 1.53 | 1.38 | 0.15 |  |  | 1564 | 0.32 | 0.26 | 0.06 |  |  |
| AKR1C1 | 1377 | 0.8 | 0.73 | 0.07 |  |  | 1564 | 0.38 | 0.19 | 0.19 |  |  |
| AKR1C2 | 1377 | 0.87 | 0.8 | 0.07 |  |  | 1564 | 0.64 | 0.45 | 0.19 |  |  |
| AKR1C3 | 1377 | 0.87 | 0.73 | 0.07 | 0.07 |  | 1564 | 0.58 | 0.32 | 0.19 | 0.06 |  |
| AKR1C4 | 1377 | 1.02 | 0.87 | 0.07 |  | 0.07 | 1564 | 0.38 | 0.38 |  |  |  |
| AKR1D1 | 1377 | 1.02 | 0.87 | 0.15 |  |  | 1564 | 0.51 | 0.38 | 0.13 |  |  |
| AKR1E2 | 1377 | 1.02 | 0.94 | 0.07 |  |  | 1564 | 0.26 | 0.19 | 0.06 |  |  |
