# Supplementary material for: Comprehensive clinical analysis of AKR1 expression profiles in the diagnosis of human colorectal cancer
Source: Research Square preprint supplement (doi:10.21203/rs.3.rs-2526991/v1), 2023-02-07
Supplement: Supplementary file 3 [file df278fef1e1d58a5b52d5d4e.docx]

**Supplement 5** AKR1 antibody antigen site

| Antibody | Recombinant fragment corresponding to |
| --- | --- |
| AKR1A1 | Human AKR1A1 aa 100-200 |
| AKR1B1 | 102-135 aa from the central region of human AKR1B1 |
| AKR1B10 | Produced in our laboratoryARL-1 aa204-261 to the C-terminalDDKGNAIGGKATFLC |
| AKR1B15 | The C-terminal region of human AKR1B15 |
| AKR1C1 | Synthetic peptide within Human AKR1C1 aa 250 to the C-terminal |
| AKR1C2 | Human AKR1C2 aa 200 to the C-terminus. |
| AKR1C3 | A 15 aa peptide corresponding to the C terminal residues of human AKR1C3 |
| AKR1C4 | A synthetic peptide (DPKYQRVELNDGH-C)corresponding to human AKR1C4. |
| AKR1D1 | Recombinant fragment corresponding to Human AKR1D1 aa 1-100 |
| AKR1E2 | Conjugated synthetic peptide between 291-320 aa from the C-terminal region of human AKR1E2. |
