# Supplementary material for: Comprehensive clinical analysis of AKR1 expression profiles in the diagnosis of human colorectal cancer
Source: Research Square preprint supplement (doi:10.21203/rs.3.rs-2526991/v1), 2023-02-07
Supplement: Supplementary file 4 [file f88baf132a67ea1de7532e74.docx]

**Supplement 2** The variation in AKR1 transcript levels between different types of CRC tissues versus normal colorectal tissues (Oncomine)

| AKR1s | Type of Colorectal Cancer versus Normal Colorectal Tissues | Fold Change | *p* Value | *t* Test | Source and/or Reference |
| --- | --- | --- | --- | --- | --- |
| AKR1A1 | Rectal Mucinous Adenocarcinoma | 1.365 | 0.017 | 2.474 | TCGA |
| Colon Mucinous Adenocarcinoma | 1.286 | 0.002 | 3.059 | TCGA |
| Cecum Adenocarcinoma | 1.262 | 0.013 | 2.324 | TCGA |
| Colon Adenocarcinoma | 1.139 | 0.041 | 1.807 | TCGA |
| Rectal Adenocarcinoma | 1.071 | 0.194 | 0.873 | TCGA |
| Rectosigmoid Adenocarcinoma | -1.029 | 0.568 | -0.187 | TCGA |
| AKR1B1 | Rectal Adenocarcinoma | -3.508 | 3.93E-21 | -13.876 | TCGA |
| Colon Adenocarcinoma | -3.029 | 8.52E-19 | -14.093 | TCGA |
| Cecum Adenocarcinoma | -3.178 | 1.37E-11 | -9.567 | TCGA |
| Colon Mucinous Adenocarcinoma | -2.594 | 1.30E-10 | -8.545 | TCGA |
| AKR1B10 | Colon Adenocarcinoma | -12.803 | 3.46E-31 | -16.691 | TCGA |
| Rectal Adenocarcinoma | -13.541 | 1.33E-25 | -15.2 | TCGA |
| Rectal Mucinous Adenocarcinoma | -17.872 | 4.42E-05 | -9.377 | TCGA |
| Colon Mucinous Adenocarcinoma | -13.601 | 4.07E-09 | -8.5 | TCGA |
| Cecum Adenocarcinoma | -11.69 | 9.53E-10 | -8.994 | TCGA |
| AKR1B15 | Colon Adenocarcinoma | -7.222 | 5.91E-27 | -16.701 | TCGA |
| Rectal Adenocarcinoma | -8.184 | 9.61E-26 | -15.724 | TCGA |
| Colon Mucinous Adenocarcinoma | -6.863 | 7.43E-12 | -10.382 | TCGA |
| Rectal Mucinous Adenocarcinoma | -10.95 | 2.81E-05 | -9.599 | TCGA |
| Cecum Adenocarcinoma | -7.192 | 2.53E-10 | -9.251 | TCGA |
| AKR1C1 | Rectosigmoid Adenocarcinoma | -4.449 | 1.39E-09 | -10.045 | TCGA |
| Rectal Mucinous denocarcinoma | -2.776 | 1.56E-05 | -7.499 | TCGA |
| Colon Adenocarcinoma | -2.159 | 3.56E-14 | -9.294 | TCGA |
| AKR1C2 | Rectosigmoid Adenocarcinoma | -5.355 | 1.31E-06 | -18.693 | TCGA |
| Colon Adenocarcinoma | -2.159 | 3.56E-14 | -9.294 | TCGA |
| AKR1C3 | Rectosigmoid Adenocarcinoma | -4.545 | 0.002 | -6.501 | TCGA |
| Colon Mucinous Adenocarcinoma | -3.66 | 2.91E-07 | -6.131 | TCGA |
| Colon Adenocarcinoma | -3.103 | 5.25E-10 | -7.492 | TCGA |
| Cecum Adenocarcinoma | -3.1 | 3.05E-06 | -5.276 | TCGA |
| Rectal Mucinous denocarcinoma | -2.277 | 0.004 | -3.494 | TCGA |
| Rectal Adenocarcinoma | -2.534 | 1.38E-07 | -5.877 | TCGA |
| AKR1C4 | Rectal Adenocarcinoma | 3.416 | 4.61E-11 | 7.465 | TCGA |
| Colon Adenocarcinoma | 2.562 | 7.25E-11 | 7.605 | TCGA |
| Rectosigmoid Adenocarcinoma | 1.302 | 0.006 | 2.77 | TCGA |
| Cecum Adenocarcinoma | 2.979 | 9.02E-06 | 5.105 | TCGA |
| Colon Mucinous Adenocarcinoma | 2.467 | 2.75E-04 | 3.896 | TCGA |
| Rectal Mucinous denocarcinoma | 4.455 | 0.01 | 3.24 | TCGA |
| AKR1D1 | Rectal Mucinous denocarcinoma | 1.954 | 9.42E-04 | 4.145 | TCGA |
| Rectal Adenocarcinoma | 1.728 | 5.68E-06 | 5.014 | TCGA |
| Rectosigmoid Adenocarcinoma | 2.917 | 0.039 | 3.013 | TCGA |
| Colon Adenocarcinoma | 1.49 | 3.41E-04 | 3.685 | TCGA |
| Cecum Adenocarcinoma | 1.542 | 0.003 | 2.881 | TCGA |
| Colon Mucinous Adenocarcinoma | 1.254 | 0.085 | 1.402 | TCGA |
| AKR1E2 | Rectal Mucinous denocarcinoma | 2.428 | 4.63E-05 | 7.07 | TCGA |
| Colon Adenocarcinoma | 2.184 | 9.39E-14 | 8.944 | TCGA |
| Cecum Adenocarcinoma | 2.643 | 6.12E-09 | 7.592 | TCGA |
| Rectal Adenocarcinoma | 2.114 | 5.52E-11 | 7.468 | TCGA |

TCGA, The Cancer Genome Atlas.
